# Supplementary material for: Effects of foliar application of salicylic acid and nitric oxide in alleviating iron deficiency induced chlorosis of Arachis hypogaea L
Source: PubMed Central journal article supplement (PMC5432746; doi:10.1186/1999-3110-55-9), 2014-01-20

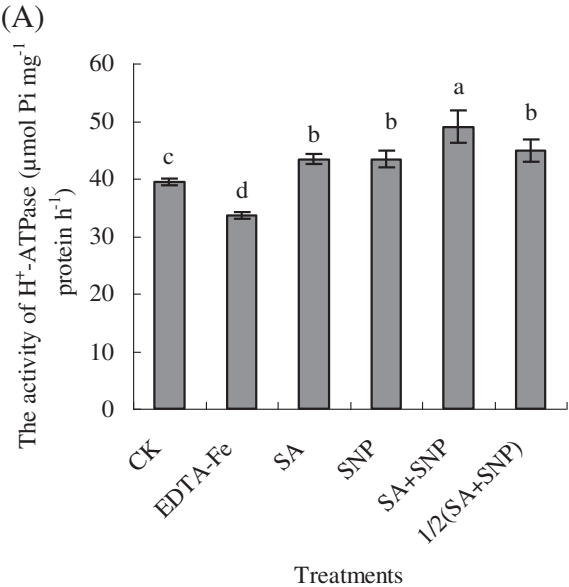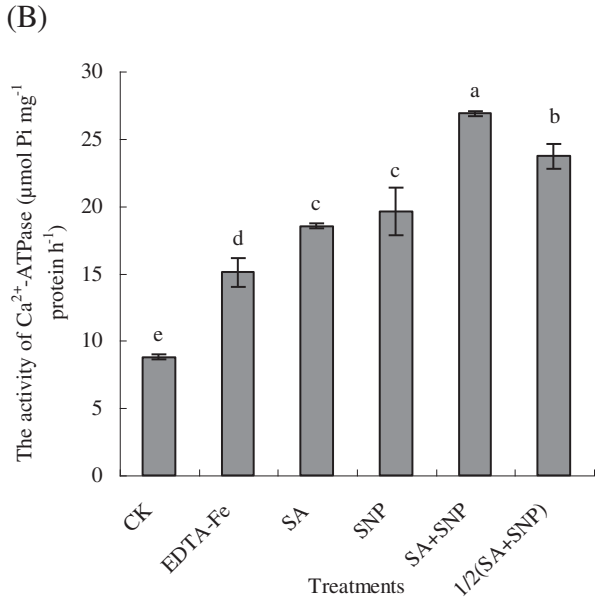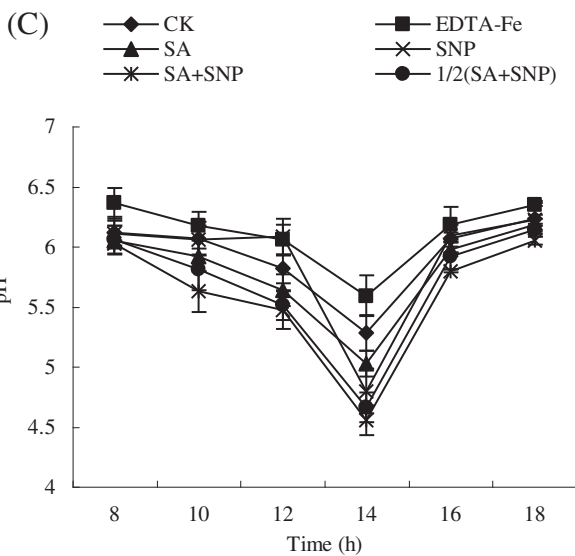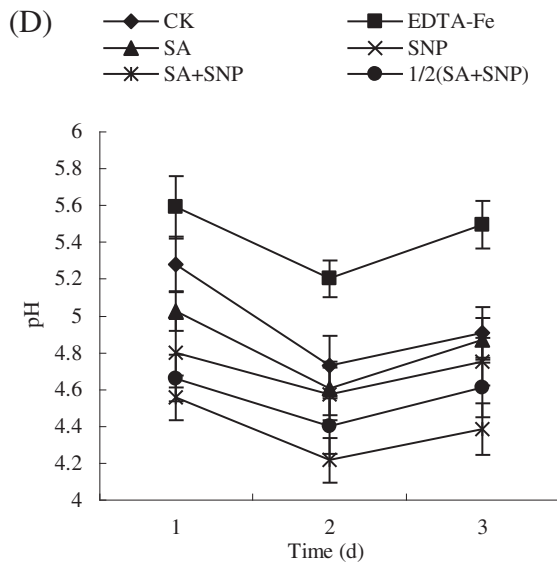

Supplement: 40529_2013_60_MOESM1_ESM.pdf [file 40529_2013_60_MOESM1_ESM.pdf]
